# Supplementary material for: Multi-scale synergistic modification of CO2 carbonation coal-based solid waste backfill utilizing high-salinity mine water: Balancing carbon sequestration and engineering performance
Source: Research Square preprint supplement (doi:10.21203/rs.3.rs-8654806/v1), 2026-01-29
Supplement: Supplementary file 1 [file 53d08906afaf18d005548c67.docx]

**Table S1.** Rheology.

| **Shear rate/**  **(s-1)** | **Shear stress/ (Pa)** | | | | | | | | |
| --- | --- | --- | --- | --- | --- | --- | --- | --- | --- |
| CCB | CCB-R | CCB-N | CCB-S | CCB-RN | CCB-RS | CCB-Rn | CCB-RNn | CCB-RSn |
| 10.2 | 25.7 | 59.95 | 47.23 | 103.04 | 41.6 | 90.01 | 53.55 | 34.16 | 73.02 |
| 20.4 | 29.62 | 67.89 | 53.07 | 122.31 | 47.68 | 104.04 | 60.8 | 38.42 | 82.96 |
| 51 | 35.27 | 83.08 | 65.57 | 160.28 | 58.63 | 130.1 | 71.99 | 46.57 | 101.63 |
| 102 | 41.43 | 96.85 | 75.63 | 197.73 | 68.87 | 155.01 | 83.41 | 53.48 | 118.99 |

**Table S2.** Setting time.

| **Specimen** | **Setting time/ (h)** | |
| --- | --- | --- |
| Initial | Final |
| CCB | 19 | 24 |
| CCB-R | 16.5 | 19.5 |
| CCB-N | 18.5 | 22 |
| CCB-S | 13 | 16.5 |
| CCB-RN | 18 | 21 |
| CCB-RS | 14.5 | 18.5 |
| CCB-Rn | 15 | 17.5 |
| CCB-RNn | 17.5 | 19.5 |
| CCB-RSn | 13.5 | 16 |

**Table S3.** Porosity & Drying shrinkage.

| **Specimen** | **Porosity/ (%)** | **Drying shrinkage/ (μm/m)** |
| --- | --- | --- |
| CCB | 27.16 | -1386.22 |
| CCB-R | 30.17 | -2916.36 |
| CCB-N | 30.57 | -4786.77 |
| CCB-S | 30.97 | -5135.19 |
| CCB-RN | 30.29 | -3110.1 |
| CCB-RS | 30.37 | -3689.28 |
| CCB-Rn | 29.8 | -1694.2 |
| CCB-RNn | 29.93 | -1871.3 |
| CCB-RSn | 30.05 | -2430.01 |
